# Supplementary material for: Pervasive carbonation of peridotite to listvenite (Semail Ophiolite, Sultanate of Oman): clues from iron partitioning and chemical zoning
Source: Copernicus journal article supplement (doi:10.5194/ejm-35-171-2023), 2023-03-21
Supplement: Supplementary file 1 [file ejm-35-171-2023-supplement.zip]

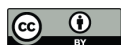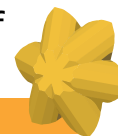

*Supplement of*

**Pervasive carbonation of peridotite to listvenite (Semail Ophiolite, Sultanate of Oman): clues from iron partitioning and chemical zoning**

**Thierry Decrausaz et al.**

*Correspondence to:* Thierry Decrausaz ([thierry.decrausaz@umontpellier.fr](mailto:thierry.decrausaz@umontpellier.fr))

- [ejm-35-171-2023-supplement-title-page.pdf](#)
- [Decrausaz\\_et\\_al\\_SI\\_Tables.xlsx](#)
- [Decrausaz\\_et\\_al\\_SI\\_Text.docx](#)

The copyright of individual parts of the supplement might differ from the article licence.
